# Supplementary material
Source: PubMed Central journal article supplement (PMC6474822)
Supplement: NIHMS1022733-supplement-Supplemental_Text_and_Figures.pdf [file NIHMS1022733-supplement-Supplemental_Text_and_Figures.pdf]

**Supplement to:**

**Deconvoluting Stress-Responsive Proteostasis Signaling Pathways for Pharmacologic Activation  
using Targeted RNA-sequencing**

Julia M.D. Grandjean<sup>1</sup>, Lars Plate<sup>1,2</sup>, Richard I. Morimoto<sup>3</sup>, Michael J. Bollong<sup>2</sup>, Evan T. Powers<sup>2</sup>, and R. Luke Wiseman<sup>1,\*</sup>

<sup>1</sup>Department of Molecular Medicine, <sup>2</sup>Department of Chemistry, The Scripps Research Institute, La Jolla, CA, USA, <sup>3</sup>Department of Molecular Biosciences, Rice Institute for Biomedical Research, Northwestern University, Evanston, IL, USA

\*To whom correspondences should be addressed:

R. Luke Wiseman

Department of Molecular Medicine

The Scripps Research Institute

La Jolla, CA 92037

Email: [wiseman@scripps.edu](mailto:wiseman@scripps.edu)

Phone: (858) 784-8820

Running Title: Targeted RNAseq assay for stress-signaling

Keywords: Targeted RNAseq; unfolded protein response; heat shock response; HSF1; oxidative stress response; small molecule activator; screening

## SUPPLEMENTAL FIGURE LEGENDS

### Figure S1 (Supplement to Fig. 1)

- A. Percentage of total aligned reads reporting on the selected 150 target genes of interest for Targeted RNAseq, or whole-transcriptome RNAseq from HEK293<sup>TREX</sup> cells expressing dox-inducible cHSF1<sup>8</sup>, or HEK293<sup>DAX</sup> cells expressing TMP-inducible ATF6 and dox-inducible XBP1s<sup>15</sup>
- B. Average reads per individual gene in our Targeted RNAseq assay across all treatment conditions.
- C. Total reads per individual gene in our Targeted RNAseq assay across all treatment conditions.
- D. Example correlation analysis from our Targeted RNAseq assay showing the log<sub>2</sub> normalized aligned counts from two replicates of DMSO-treated HEK293T cells. The tight correlation demonstrates the reproducibility of this assay across individual replicates.
- E. Average R<sup>2</sup> values from correlations of three technical replicates (calculated as in **Fig. S1D**) for each treatment condition used in our Targeted RNAseq assay (see **Table 2** and **Table S1**).
- F. Heat map of relative gene expression values across the Targeted RNAseq panel of 150 genes (y-axis) Versus a total of 19 treatment conditions (including vehicle controls per cell type).

### Figure S2 (Supplement to Fig. 2)

- A. Log<sub>2</sub> normalized aligned transcript counts for HEK293<sup>TREX</sup> cells expressing doxycycline (dox)-inducible cHSF1 treated with 2.25 μM dox (y-axis) or vehicle (x-axis) for 16 h. Aligned transcript counts represent averages from three independent replicates quantified from published whole transcriptome RNAseq {Ryno, 2014 #73}. All identified genes are HSR target genes.
- B. Plot showing residuals calculated by comparing the expression of our panel of stress-responsive genes between HEK293<sup>TREX</sup> cells expressing dox-inducible cHSF1 following 16 h treatment with dox (2.25 μM) or vehicle. Calculation of residuals was performed as described in **Fig. 2A**. Statistics were calculated using one-way ANOVA. Significance shown reflects comparison to “Other” target transcript set. \*\*\*\*p<0.0001. See **Table S3** for full ANOVA table.
- C. Residual values per target gene from whole-transcriptome RNAseq data (x-axis){Ryno, 2014 #73} vs. Targeted RNAseq (y-axis) in HEK293<sup>TREX</sup> cells expressing dox-inducible cHSF1 following 16 h treatment with dox (2.25μM doxycycline).

### Figure S3 (Supplement to Fig. 3)

- A.** Log<sub>2</sub> normalized aligned transcript counts for HEK293<sup>DAX</sup> cells treated with 1 μM Thapsigargin (y-axis) or vehicle (x-axis) for 4 h. Aligned transcript counts represent averages from three independent replicates quantified from our targeted RNAseq data. All identified genes are UPR target genes.
- B.** Plot showing residuals calculated by comparing the expression of our panel of stress-responsive genes between HEK293<sup>DAX</sup> cells following 4 h treatment with Tg (1 μM; induces UPR) and vehicle. Calculation of residuals was performed as described in **Fig. 2A**. Statistics were calculated using one-way ANOVA. Significance shown reflects comparison to “Other” target transcript set. \*\*\*\*p<0.0001. See **Table S3** for full ANOVA table.
- C.** Residual values per target gene from whole-transcriptome RNAseq data (x-axis){Shoulders, 2013 #7} vs. Targeted RNAseq (y-axis) for HEK293<sup>DAX</sup> cells following treatment with trimethoprim (10 μM, 4 h; activates DHFR.ATF6).
- D.** Residual values per target gene from whole-transcriptome RNAseq data (x-axis){Shoulders, 2013 #7} vs. Targeted RNAseq (y-axis) for HEK293<sup>DAX</sup> cells following treatment with doxycycline (1 μg/mL μM, 4 h; activates dox-inducible XBP1s).
- E.** Residual values per target gene from whole-transcriptome RNAseq data (x-axis){Shoulders, 2013 #7} vs. Targeted RNAseq (y-axis) for HEK293<sup>DAX</sup> cells following treatment with both trimethoprim (10 μM, 4 h; activates DHFR.ATF6) and doxycycline (1 μg/mL μM, 4 h; activates dox-inducible XBP1s).

### Figure S4 (Supplement to Fig. 4)

Plot showing residuals calculated by comparing the expression of our stress-responsive gene panel between HEK293T cells following treatment with paraquat (PQ; 400 μM, 24 h) or vehicle. Calculation of residuals was performed as described in **Fig. 2A**. Genes are grouped by target stress-responsive signaling pathway. Statistics were calculated using one-way ANOVA, significance shown reflects comparison to “Other” target transcript set. See **Table S3** for full ANOVA table.

**Figure S5 (Supplement to Fig 5).**

- A.** Structures of the putative NRF2 activating compounds bardoxolone and CBR-470-1.
- B.** Graph showing  $\log_2$  fold change normalized counts of the HSR target gene *BAG3* in HEK293T cells treated with bardoxolone (1  $\mu$ M; 24 h) or CBR-470-1 (10  $\mu$ M; 24 h), as calculated from our targeted RNAseq assay. Error bars show SEM for n=3 independent experiments. P-values calculated using one-tailed Student's t-test.
- C.** Graph showing  $\log_2$  fold change normalized counts of the UPR (ATF6) target gene *BIP* in HEK293T cells treated with bardoxolone (1  $\mu$ M; 24 h) or CBR-470-1 (10  $\mu$ M; 24 h), as calculated from our targeted RNAseq assay. Error bars show SEM for n=3 independent experiments. P-values calculated using one-tailed Student's t-test.
- D.** Graph showing  $\log_2$  fold change normalized counts of the OSR target gene *HMOX1* in HEK293T cells treated with bardoxolone (1  $\mu$ M; 24 h) or CBR-470-1 (10  $\mu$ M; 24 h), as calculated from our targeted RNAseq assay. Error bars show SEM for n=3 independent experiments. P-values calculated using one-tailed Student's t-test.

**Figure S6 (Supplement to Fig. 6)**

- A.** Structures of the four putative HSF1 activating compounds A3, C1, D1, and F1.
- B.** Plot showing residuals calculated by comparing the expression of our stress-responsive gene panel between HEK293T cells treated with compound A3 (10  $\mu$ M, 4 h) or vehicle from whole-transcriptome RNAseq. Calculation of residuals was performed as described in **Fig. 2A**. Genes are grouped by target stress-responsive signaling pathway. Statistics were calculated using one-way ANOVA. Significance shown reflects comparison to "Other" target transcript set. \*\*\*\*p<0.0001.
- C.** Plot showing residuals calculated by comparing the expression of our stress-responsive gene panel between HEK293T cells treated with compound C1 (10  $\mu$ M, 4 h) or vehicle from whole-transcriptome RNAseq. Calculation of residuals was performed as described in **Fig. 2A**. Genes are grouped by target stress-responsive signaling pathway. Statistics were calculated using one-way ANOVA. Significance shown reflects comparison to "Other" target transcript set. \*\*\*\*p<0.0001.

- D. Plot showing residuals calculated by comparing the expression of our stress-responsive gene panel between HEK293T cells treated with compound D1 (10  $\mu$ M, 4 h) or vehicle from whole-transcriptome RNAseq. Calculation of residuals was performed as described in **Fig. 2A**. Genes are grouped by target stress-responsive signaling pathway. Statistics were calculated using one-way ANOVA. Significance shown reflects comparison to “Other” target transcript set. \*\*\*\* $p < 0.0001$ .
- E. Plot showing residuals calculated by comparing the expression of our stress-responsive gene panel between HEK293T cells treated with compound F1 (10  $\mu$ M, 4 h) or vehicle from whole-transcriptome RNAseq. Calculation of residuals was performed as described in **Fig. 2A**. Genes are grouped by target stress-responsive signaling pathway. Statistics were calculated using one-way ANOVA. Significance shown reflects comparison to “Other” target transcript set. \*\*\*\* $p < 0.0001$ .
- F. One-way ANOVA statistical analysis for grouped residual values in (**Fig. S6B**).
- G. One-way ANOVA statistical analysis for grouped residual values in (**Fig. S6C**).
- H. One-way ANOVA statistical analysis for grouped residual values in (**Fig. S6D**).
- I. One-way ANOVA statistical analysis for grouped residual values in (**Fig. S6E**).

#### **Figure S7 (Supplement to Concluding Remarks)**

- A. Plot showing residuals calculated by comparing the expression of our stress-responsive gene panel between MEF cells treated with compound As (III) (25  $\mu$ M, 6h) or vehicle from whole-transcriptome RNAseq. Calculation of residuals was performed as described in **Fig. 2A**. Genes are grouped by target stress-responsive signaling pathway. Statistics were calculated using one-way ANOVA. Significance shown reflects comparison to “Other” target transcript set. \*\*\*\* $p < 0.0001$ .
- B. Plot showing residuals calculated by comparing the expression of our stress-responsive gene panel between MEF cells treated with compound Tg (1  $\mu$ M, 6h) or vehicle from whole-transcriptome RNAseq. Calculation of residuals was performed as described in **Fig. 2A**. Genes are grouped by target stress-responsive signaling pathway. Statistics were calculated using one-way ANOVA. Significance shown reflects comparison to “Other” target transcript set. \* $p < 0.05$ , \*\*\*\* $p < 0.0001$ .

**FIGURE S1**

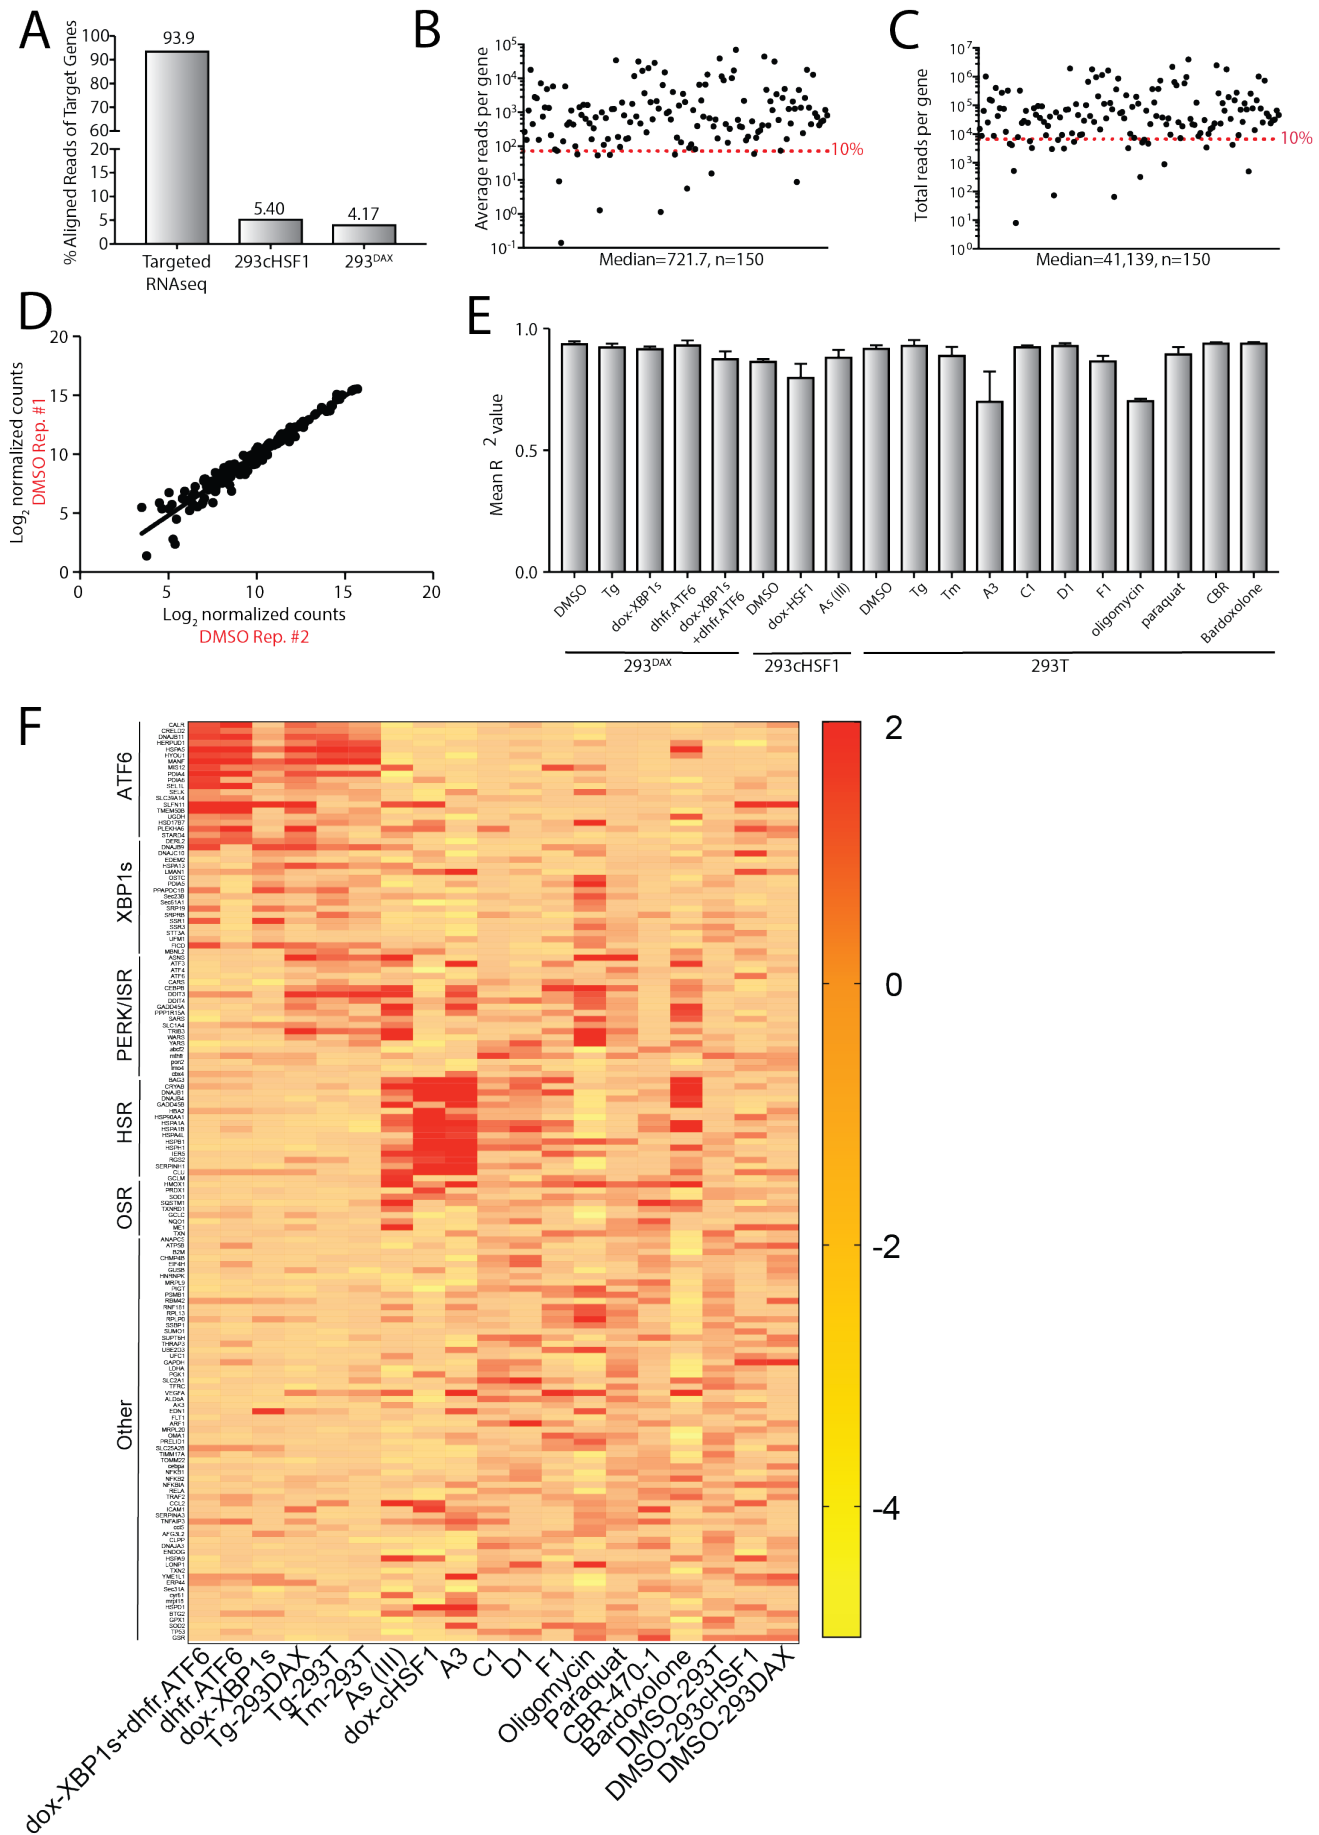

**FIGURE S2**

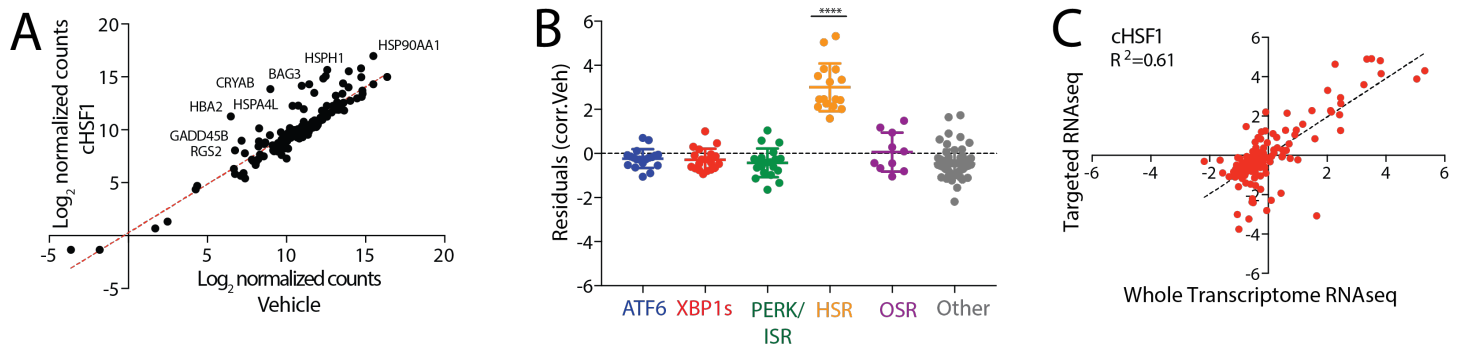

FIGURE S3

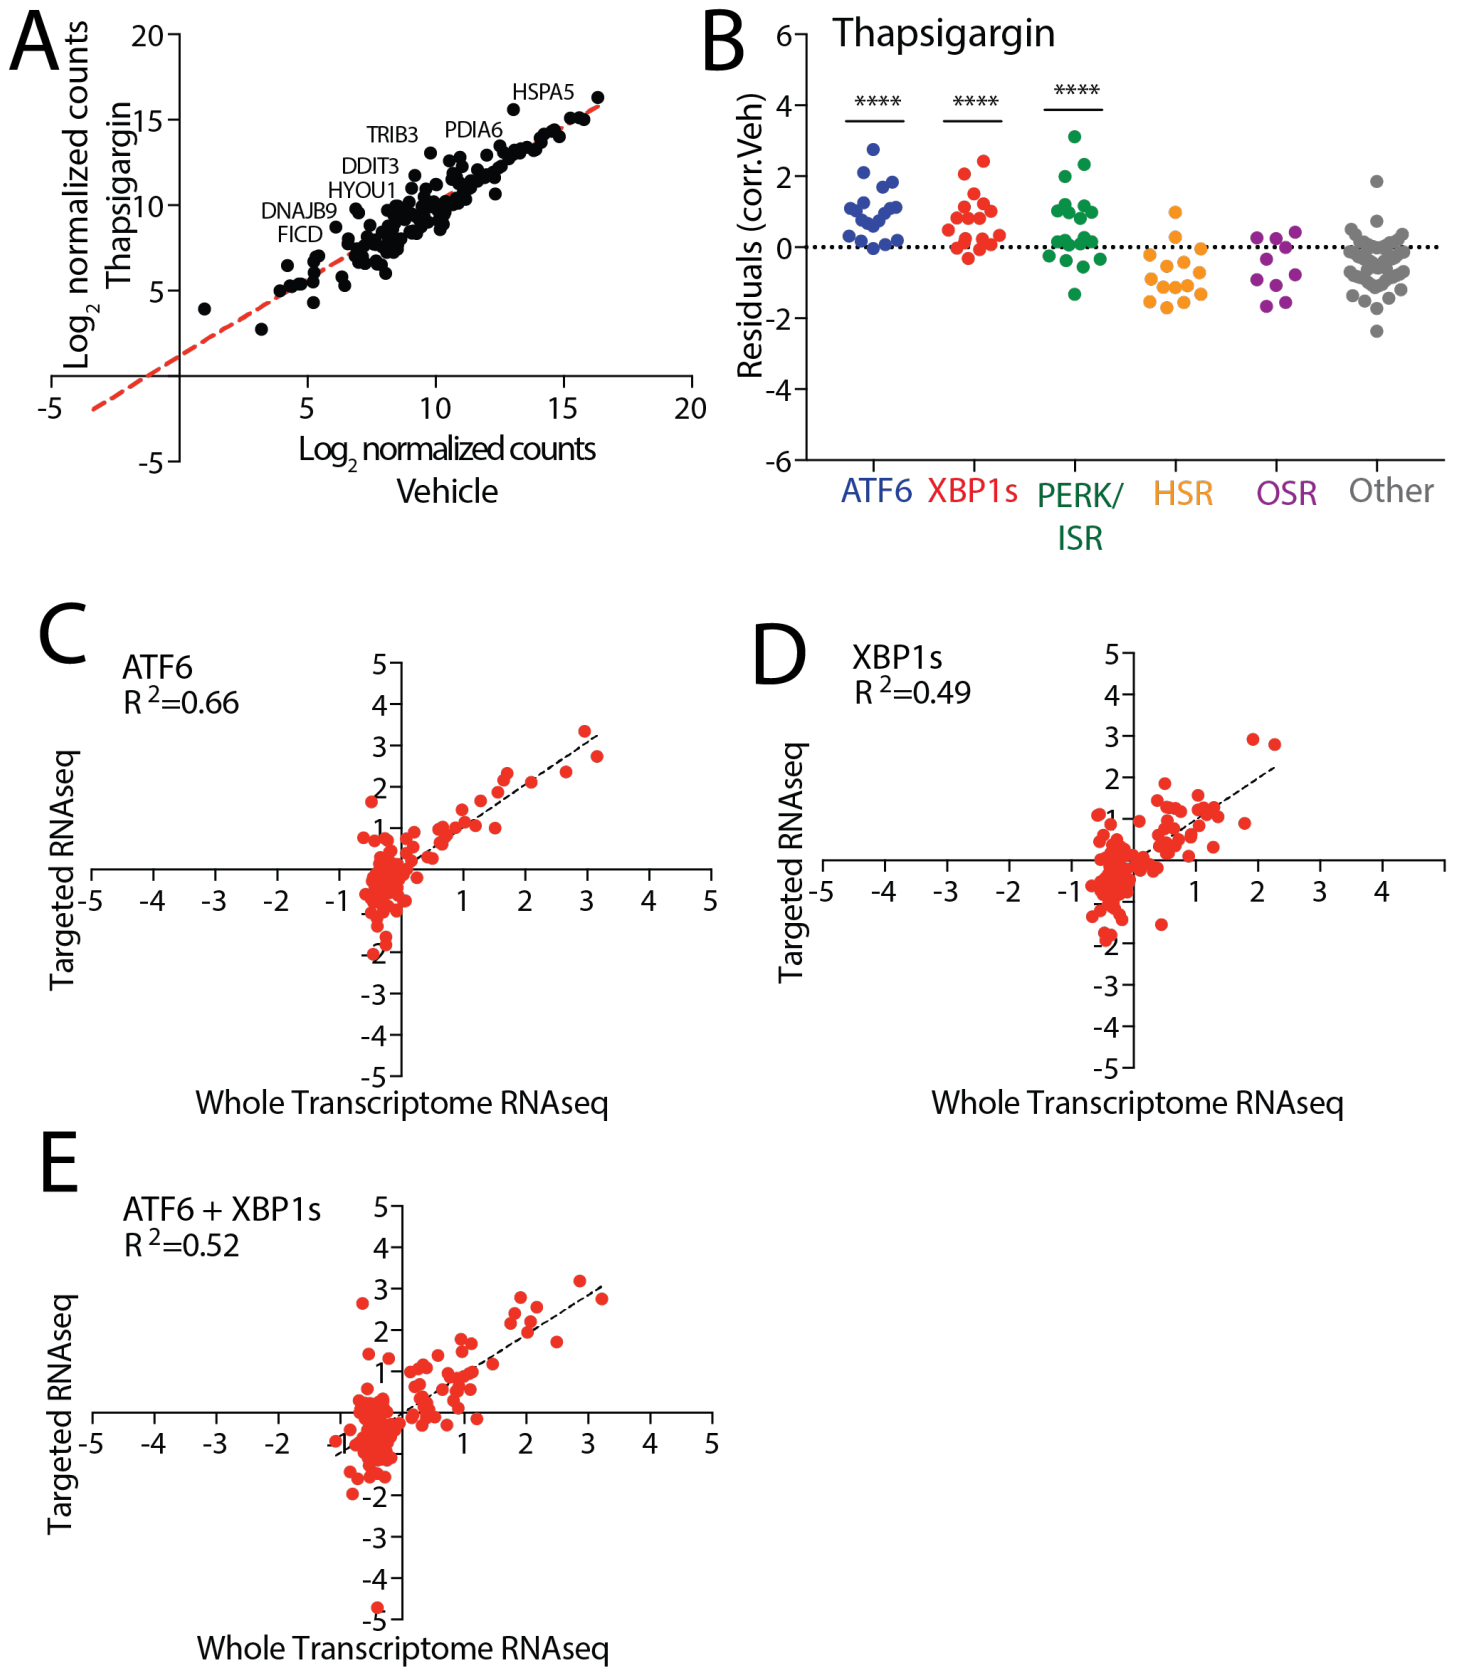



FIGURE S4

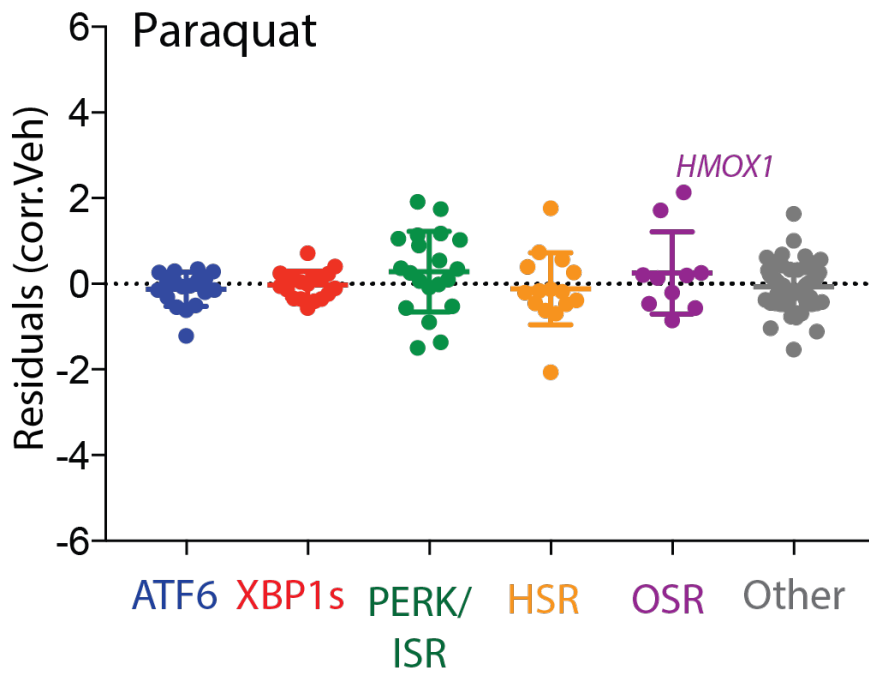

FIGURE S5

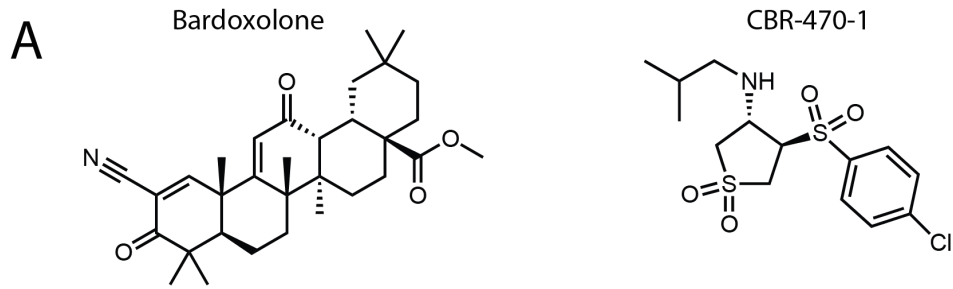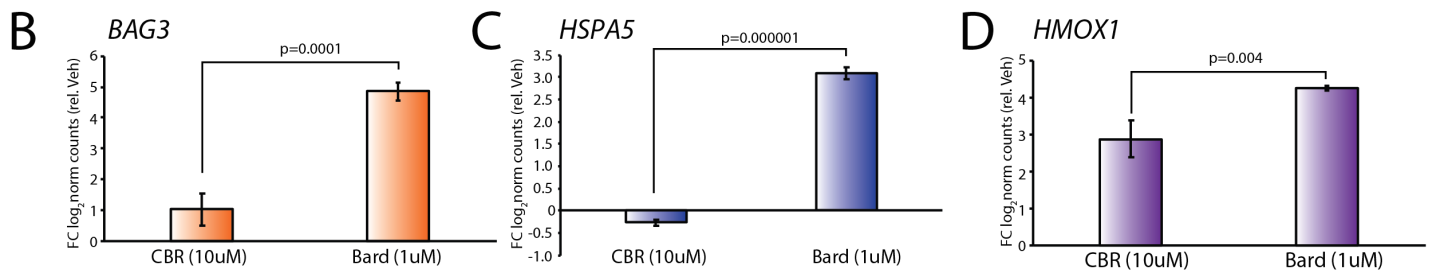

**FIGURE S6**

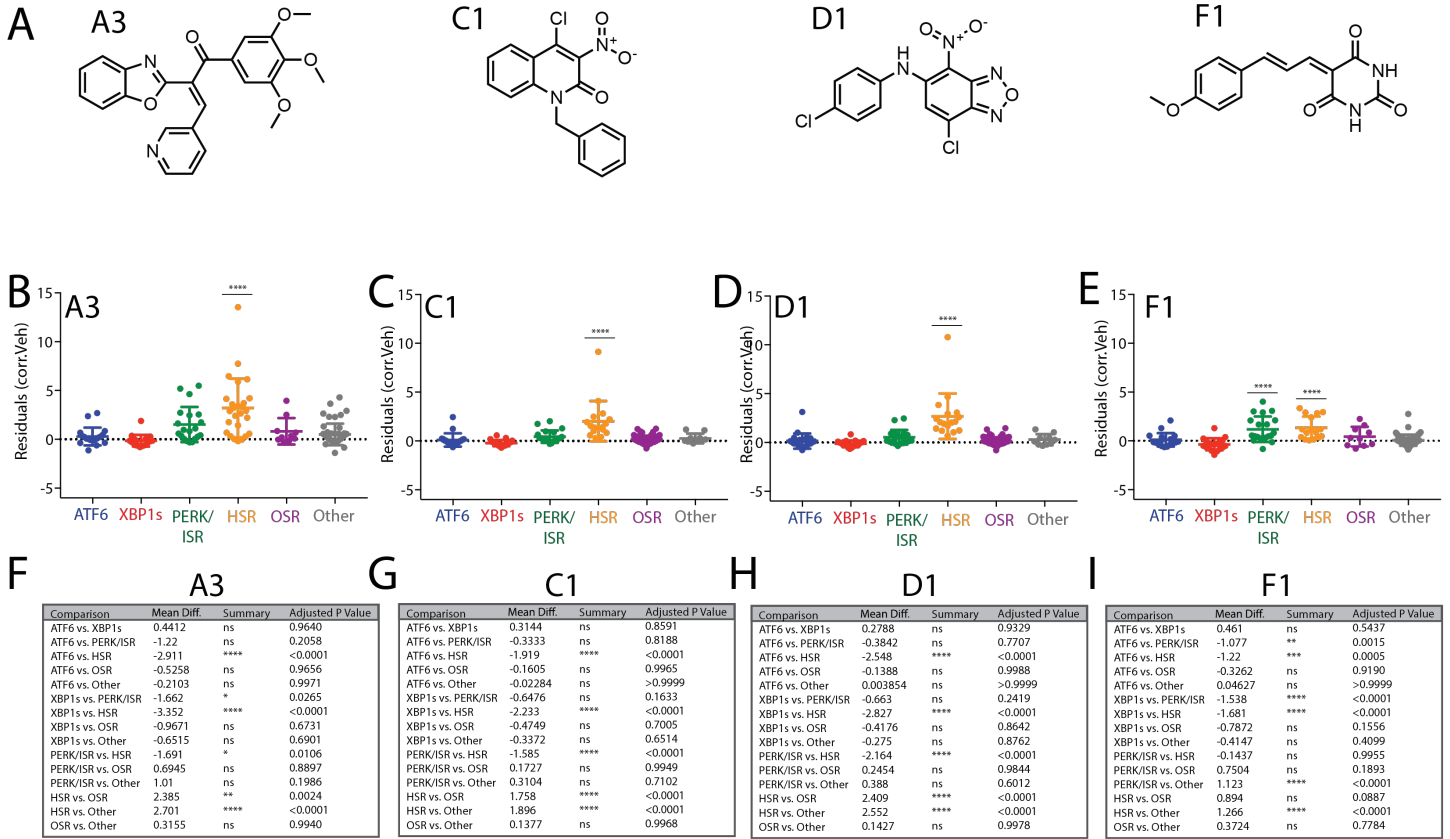

**FIGURE S7**

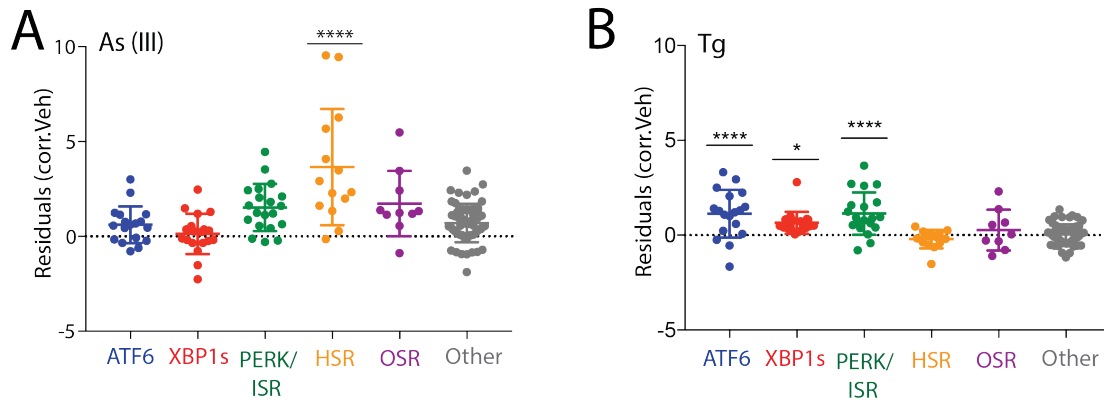

**Table S1. Treatment conditions for Targeted RNAseq with concentrations and treatment durations (see Excel Spreadsheet)**

**Table S2 Aligned counts from Targeted RNAseq (see Excel Spreadsheet)**

**Table S3. ANOVA Statistical Analysis from Targeted RNAseq**

| HSF1               |            |         |                  | XBP1s              |            |         |                  | ATF6               |            |         |                  | XBP1s+ATF6         |            |         |                  |
|--------------------|------------|---------|------------------|--------------------|------------|---------|------------------|--------------------|------------|---------|------------------|--------------------|------------|---------|------------------|
| Comparison         | Mean Diff. | Summary | Adjusted P Value | Comparison         | Mean Diff. | Summary | Adjusted P Value | Comparison         | Mean Diff. | Summary | Adjusted P Value | Comparison         | Mean Diff. | Summary | Adjusted P Value |
| ATF6 vs. XBP1s     | -0.2735    | ns      | 0.9671           | ATF6 vs. XBP1s     | -0.5015    | ns      | 0.1807           | ATF6 vs. XBP1s     | 1.546      | ****    | <0.0001          | ATF6 vs. XBP1s     | 0.6466     | ns      | 0.1510           |
| ATF6 vs. PERK/ISR  | -0.2218    | ns      | 0.9878           | ATF6 vs. PERK/ISR  | 0.7097     | *       | 0.0123           | ATF6 vs. PERK/ISR  | 1.717      | ****    | <0.0001          | ATF6 vs. PERK/ISR  | 1.886      | ****    | <0.0001          |
| ATF6 vs. HSR       | -3.863     | ****    | <0.0001          | ATF6 vs. HSR       | 1.016      | ***     | 0.0002           | ATF6 vs. HSR       | 1.772      | ****    | <0.0001          | ATF6 vs. HSR       | 1.989      | ****    | <0.0001          |
| ATF6 vs. OSR       | -0.421     | ns      | 0.9057           | ATF6 vs. OSR       | 1.119      | ****    | 0.0003           | ATF6 vs. OSR       | 1.891      | ****    | <0.0001          | ATF6 vs. OSR       | 2.09       | ****    | <0.0001          |
| ATF6 vs. Other     | -0.1022    | ns      | 0.9991           | ATF6 vs. Other     | 0.8789     | ****    | <0.0001          | ATF6 vs. Other     | 1.737      | ns      | 0.9961           | ATF6 vs. Other     | 1.808      | ****    | <0.0001          |
| XBP1s vs. PERK/ISR | 0.05166    | ns      | >0.9999          | XBP1s vs. PERK/ISR | 1.211      | ****    | <0.0001          | XBP1s vs. PERK/ISR | 0.1717     | ns      | 0.9412           | XBP1s vs. PERK/ISR | 1.239      | ****    | <0.0001          |
| XBP1s vs. HSR      | -3.59      | ****    | <0.0001          | XBP1s vs. HSR      | 1.517      | ****    | <0.0001          | XBP1s vs. HSR      | 0.2259     | ns      | 0.8722           | XBP1s vs. HSR      | 1.343      | ****    | <0.0001          |
| XBP1s vs. OSR      | -0.1475    | ns      | 0.9992           | XBP1s vs. OSR      | 1.62       | ****    | <0.0001          | XBP1s vs. OSR      | 0.3449     | ns      | 0.6569           | XBP1s vs. OSR      | 1.444      | ****    | 0.0002           |
| XBP1s vs. Other    | 0.1712     | ns      | 0.9894           | XBP1s vs. Other    | 1.38       | ****    | <0.0001          | XBP1s vs. Other    | 0.1916     | ns      | 0.8117           | XBP1s vs. Other    | 1.161      | ****    | <0.0001          |
| PERK/ISR vs. HSR   | -3.641     | ****    | <0.0001          | PERK/ISR vs. HSR   | 0.3062     | ns      | 0.7370           | PERK/ISR vs. HSR   | 0.05413    | ns      | 0.9998           | PERK/ISR vs. HSR   | 0.1038     | ns      | 0.9991           |
| PERK/ISR vs. OSR   | -0.1992    | ns      | 0.9968           | PERK/ISR vs. OSR   | 0.4091     | ns      | 0.5805           | PERK/ISR vs. OSR   | 0.1732     | ns      | 0.9727           | PERK/ISR vs. OSR   | 0.2048     | ns      | 0.9872           |
| PERK/ISR vs. Other | 0.1196     | ns      | 0.9982           | PERK/ISR vs. Other | 0.1692     | ns      | 0.9128           | PERK/ISR vs. Other | 0.01982    | ns      | >0.9999          | PERK/ISR vs. Other | -0.07768   | ns      | 0.9991           |
| HSR vs. OSR        | 3.442      | ****    | <0.0001          | HSR vs. OSR        | 0.1029     | ns      | 0.9988           | HSR vs. OSR        | 0.119      | ns      | 0.9961           | HSR vs. OSR        | 0.101      | ns      | 0.9997           |
| HSR vs. Other      | 3.761      | ****    | <0.0001          | HSR vs. Other      | -0.137     | ns      | 0.9775           | HSR vs. Other      | -0.03431   | ns      | >0.9999          | HSR vs. Other      | -0.1815    | ns      | 0.9723           |
| OSR vs. Other      | 0.3187     | ns      | 0.9490           | OSR vs. Other      | -0.2399    | ns      | 0.8867           | OSR vs. Other      | -0.1534    | ns      | 0.9721           | OSR vs. Other      | -0.2825    | ns      | 0.9135           |

  

| As (II)            |            |         |                  | Oligomycin         |            |         |                  | Paraquat           |            |         |                  | Thapsigargin       |            |         |                  |
|--------------------|------------|---------|------------------|--------------------|------------|---------|------------------|--------------------|------------|---------|------------------|--------------------|------------|---------|------------------|
| Comparison         | Mean Diff. | Summary | Adjusted P Value | Comparison         | Mean Diff. | Summary | Adjusted P Value | Comparison         | Mean Diff. | Summary | Adjusted P Value | Comparison         | Mean Diff. | Summary | Adjusted P Value |
| ATF6 vs. XBP1s     | -0.5934    | ns      | 0.7071           | ATF6 vs. XBP1s     | -0.858     | ns      | 0.3063           | ATF6 vs. XBP1s     | -0.1011    | ns      | 0.9665           | ATF6 vs. XBP1s     | 0.5652     | ns      | 0.2424           |
| ATF6 vs. PERK/ISR  | -1.764     | ***     | 0.0005           | ATF6 vs. PERK/ISR  | -1.496     | **      | 0.0055           | ATF6 vs. PERK/ISR  | -0.4086    | ns      | 0.3509           | ATF6 vs. PERK/ISR  | 0.3443     | ns      | 0.7605           |
| ATF6 vs. HSR       | -2.037     | ***     | <0.0001          | ATF6 vs. HSR       | 0.6632     | ns      | 0.6571           | ATF6 vs. HSR       | -0.01337   | ns      | >0.9999          | ATF6 vs. HSR       | 1.7        | ****    | <0.0001          |
| ATF6 vs. OSR       | -2.288     | ****    | 0.0001           | ATF6 vs. OSR       | -0.633     | ns      | 0.7940           | ATF6 vs. OSR       | -0.3808    | ns      | 0.6450           | ATF6 vs. OSR       | 1.507      | ****    | <0.0001          |
| ATF6 vs. Other     | -0.4811    | ns      | 0.7045           | ATF6 vs. Other     | -0.1927    | ns      | 0.9928           | ATF6 vs. Other     | -0.06267   | ns      | 0.9991           | ATF6 vs. Other     | 1.476      | ****    | <0.0001          |
| XBP1s vs. PERK/ISR | -1.17      | ns      | 0.0593           | XBP1s vs. PERK/ISR | -0.6376    | ns      | 0.6083           | XBP1s vs. PERK/ISR | -0.3075    | ns      | 0.6508           | XBP1s vs. PERK/ISR | -0.2209    | ns      | 0.9522           |
| XBP1s vs. HSR      | -1.443     | *       | 0.0138           | XBP1s vs. HSR      | 1.521      | **      | 0.0067           | XBP1s vs. HSR      | 0.08775    | ns      | 0.9986           | XBP1s vs. HSR      | 1.135      | ****    | 0.0006           |
| XBP1s vs. OSR      | -1.695     | *       | 0.0112           | XBP1s vs. OSR      | 0.225      | ns      | 0.9972           | XBP1s vs. OSR      | -0.2797    | ns      | 0.8659           | XBP1s vs. OSR      | 0.9419     | *       | 0.0284           |
| XBP1s vs. Other    | 0.1123     | ns      | 0.9994           | XBP1s vs. Other    | 0.6653     | ns      | 0.3185           | XBP1s vs. Other    | 0.03845    | ns      | >0.9999          | XBP1s vs. Other    | 0.9107     | ****    | 0.0002           |
| PERK/ISR vs. HSR   | -0.2728    | ns      | 0.9886           | PERK/ISR vs. HSR   | 2.159      | ****    | <0.0001          | PERK/ISR vs. HSR   | 0.3952     | ns      | 0.4470           | PERK/ISR vs. HSR   | 1.356      | ****    | <0.0001          |
| PERK/ISR vs. OSR   | -0.5245    | ns      | 0.8993           | PERK/ISR vs. OSR   | 0.8626     | ns      | 0.4800           | PERK/ISR vs. OSR   | 0.02784    | ns      | >0.9999          | PERK/ISR vs. OSR   | 1.163      | **      | 0.0027           |
| PERK/ISR vs. Other | 1.283      | **      | 0.0026           | PERK/ISR vs. Other | 1.303      | **      | 0.0013           | PERK/ISR vs. Other | 0.346      | ns      | 0.2766           | PERK/ISR vs. Other | 1.132      | ****    | <0.0001          |
| HSR vs. OSR        | -0.2517    | ns      | 0.9965           | HSR vs. OSR        | -1.296     | ns      | 0.1134           | HSR vs. OSR        | -0.3674    | ns      | 0.7106           | HSR vs. OSR        | -0.1931    | ns      | 0.9904           |
| HSR vs. Other      | 1.556      | ***     | 0.0004           | HSR vs. Other      | -0.8559    | ns      | 0.1614           | HSR vs. Other      | -0.0493    | ns      | 0.9998           | HSR vs. Other      | -0.2243    | ns      | 0.9167           |
| OSR vs. Other      | 1.807      | ***     | 0.0008           | OSR vs. Other      | 0.4403     | ns      | 0.9019           | OSR vs. Other      | 0.3181     | ns      | 0.6774           | OSR vs. Other      | -0.03122   | ns      | >0.9999          |

  

| Tunicamycin        |            |         |                  | CBR-470-1          |            |         |                  | Bardoxolone        |            |         |                  |
|--------------------|------------|---------|------------------|--------------------|------------|---------|------------------|--------------------|------------|---------|------------------|
| Comparison         | Mean Diff. | Summary | Adjusted P Value | Comparison         | Mean Diff. | Summary | Adjusted P Value | Comparison         | Mean Diff. | Summary | Adjusted P Value |
| ATF6 vs. XBP1s     | 0.7554     | ns      | 0.0861           | ATF6 vs. XBP1s     | -0.06403   | ns      | 0.9998           | ATF6 vs. XBP1s     | 0.0134     | ns      | >0.9999          |
| ATF6 vs. PERK/ISR  | 0.4121     | ns      | 0.6888           | ATF6 vs. PERK/ISR  | 0.1011     | ns      | 0.9981           | ATF6 vs. PERK/ISR  | -1.012     | ns      | 0.2481           |
| ATF6 vs. HSR       | 2.009      | ****    | <0.0001          | ATF6 vs. HSR       | -0.5881    | ns      | 0.1928           | ATF6 vs. HSR       | -2.319     | ****    | <0.0001          |
| ATF6 vs. OSR       | 1.315      | ****    | 0.0020           | ATF6 vs. OSR       | -1.102     | **      | 0.0023           | ATF6 vs. OSR       | -0.4154    | ns      | 0.9751           |
| ATF6 vs. Other     | 1.396      | ****    | <0.0001          | ATF6 vs. Other     | -0.233     | ns      | 0.8402           | ATF6 vs. Other     | 0.3515     | ns      | 0.9368           |
| XBP1s vs. PERK/ISR | -0.2433    | ns      | 0.8096           | XBP1s vs. PERK/ISR | 0.1651     | ns      | 0.9791           | XBP1s vs. PERK/ISR | -1.026     | ns      | 0.2213           |
| XBP1s vs. HSR      | 1.253      | ***     | 0.0005           | XBP1s vs. HSR      | -0.5241    | ns      | 0.2826           | XBP1s vs. HSR      | -2.323     | ****    | <0.0001          |
| XBP1s vs. OSR      | 0.5599     | ns      | 0.5359           | XBP1s vs. OSR      | -1.037     | **      | 0.0040           | XBP1s vs. OSR      | -0.4288    | ns      | 0.9702           |
| XBP1s vs. Other    | 0.641      | ns      | 0.0510           | XBP1s vs. Other    | -0.1689    | ns      | 0.9453           | XBP1s vs. Other    | 0.3381     | ns      | 0.9413           |
| PERK/ISR vs. HSR   | 1.597      | ****    | <0.0001          | PERK/ISR vs. HSR   | -0.6892    | ns      | 0.0601           | PERK/ISR vs. HSR   | -1.307     | ns      | 0.0828           |
| PERK/ISR vs. OSR   | 0.9032     | ns      | 0.0745           | PERK/ISR vs. OSR   | -1.203     | ***     | 0.0004           | PERK/ISR vs. OSR   | 0.5971     | ns      | 0.8852           |
| PERK/ISR vs. Other | 0.9843     | ***     | 0.0003           | PERK/ISR vs. Other | -0.3341    | ns      | 0.4567           | PERK/ISR vs. Other | 1.364      | **      | 0.0041           |
| HSR vs. OSR        | -0.6936    | ns      | 0.3409           | HSR vs. OSR        | -0.5134    | ns      | 0.4963           | HSR vs. OSR        | 1.904      | *       | 0.0143           |
| HSR vs. Other      | 0.6125     | ns      | 0.1277           | HSR vs. Other      | 0.3552     | ns      | 0.5156           | HSR vs. Other      | 2.671      | ****    | <0.0001          |
| OSR vs. Other      | 0.08112    | ns      | 0.9998           | OSR vs. Other      | 0.8685     | **      | 0.0065           | OSR vs. Other      | 0.7668     | ns      | 0.5983           |

  

| A3                 |            |         |                  | C1                 |            |         |                  | D1                 |            |         |                  | F1                 |            |         |                  |
|--------------------|------------|---------|------------------|--------------------|------------|---------|------------------|--------------------|------------|---------|------------------|--------------------|------------|---------|------------------|
| Comparison         | Mean Diff. | Summary | Adjusted P Value | Comparison         | Mean Diff. | Summary | Adjusted P Value | Comparison         | Mean Diff. | Summary | Adjusted P Value | Comparison         | Mean Diff. | Summary | Adjusted P Value |
| ATF6 vs. XBP1s     | 0.04237    | ns      | >0.9999          | ATF6 vs. XBP1s     | 0.112      | ns      | 0.9857           | ATF6 vs. XBP1s     | 0.2399     | ns      | 0.9403           | ATF6 vs. XBP1s     | -0.1053    | ns      | 0.9987           |
| ATF6 vs. PERK/ISR  | -1.146     | ns      | 0.0587           | ATF6 vs. PERK/ISR  | -0.1011    | ns      | 0.9905           | ATF6 vs. PERK/ISR  | -0.008735  | ns      | >0.9999          | ATF6 vs. PERK/ISR  | -0.6955    | ns      | 0.0913           |
| ATF6 vs. HSR       | -4.115     | ****    | <0.0001          | ATF6 vs. HSR       | -0.8717    | ****    | <0.0001          | ATF6 vs. HSR       | -1.127     | **      | 0.0010           | ATF6 vs. HSR       | -0.8594    | *       | 0.0322           |
| ATF6 vs. OSR       | -0.8284    | ns      | 0.5256           | ATF6 vs. OSR       | -0.2562    | ns      | 0.8043           | ATF6 vs. OSR       | -0.1254    | ns      | 0.9986           | ATF6 vs. OSR       | -0.577     | ns      | 0.4599           |
| ATF6 vs. Other     | -0.4475    | ns      | 0.7581           | ATF6 vs. Other     | -0.05006   | ns      | 0.9991           | ATF6 vs. Other     | -0.05619   | ns      | 0.9998           | ATF6 vs. Other     | -0.09598   | ns      | 0.9978           |
| XBP1s vs. PERK/ISR | -1.189     | *       | 0.0351           | XBP1s vs. PERK/ISR | -0.2131    | ns      | 0.7880           | XBP1s vs. PERK/ISR | -0.2487    | ns      | 0.9187           | XBP1s vs. PERK/ISR | -0.5902    | ns      | 0.2073           |
| XBP1s vs. HSR      | -4.158     | ****    | <0.0001          | XBP1s vs. HSR      | -0.9837    | ****    | <0.0001          | XBP1s vs. HSR      | -1.367     | ****    | <0.0001          | XBP1s vs. HSR      | -0.7541    | ns      | 0.0801           |
| XBP1s vs. OSR      | -0.8707    | ns      | 0.4458           | XBP1s vs. OSR      | -0.3681    | ns      | 0.4481           | XBP1s vs. OSR      | -0.3653    | ns      | 0.8364           | XBP1s vs. OSR      | -0.4717    | ns      | 0.6664           |
| XBP1s vs. Other    | -0.4899    | ns      | 0.6393           | XBP1s vs. Other    | -0.162     | ns      | 0.8341           | XBP1s vs. Other    | -0.2961    | ns      | 0.6956           | XBP1s vs. Other    | 0.009311   | ns      | >0.9999          |
| PERK/ISR vs. HSR   | -2.969     | ****    | <0.0001          | PERK/ISR vs. HSR   | -0.7707    | ***     | 0.0003           | PERK/ISR vs. HSR   | -1.118     | ***     | 0.0007           | PERK/ISR vs. HSR   | -0.1639    | ns      | 0.9912           |
| PERK/ISR vs. OSR   | 0.318      | ns      | 0.9848           | PERK/ISR vs. OSR   | -0.1551    | ns      | 0.9707           | PERK/ISR vs. OSR   | -0.1167    | ns      | 0.9989           | PERK/ISR vs. OSR   | 0.1185     | ns      | 0.9990           |
| PERK/ISR vs. Other | 0.6989     | ns      | 0.2461           | PERK/ISR vs. Other | 0.05103    | ns      | 0.9999           | PERK/ISR vs. Other | -0.04745   | ns      | 0.9999           | PERK/ISR vs. Other | 0.5995     | ns      | 0.0506           |
| HSR vs. OSR        | 3.287      | ****    | <0.0001          | HSR vs. OSR        | 0.6156     | *       | 0.0444           | HSR vs. OSR        | 1.002      | ns      | 0.0242           | HSR vs. OSR        | 0.2824     | ns      | 0.9556           |
| HSR vs. Other      | 3.668      | ****    | <0.0001          | HSR vs. Other      | 0.8217     | ****    | <0.0001          | HSR vs. Other      | 1.071      | ****    | <0.0001          | HSR vs. Other      | 0.7634     | *       | 0.0160           |
| OSR vs. Other      | 0.3809     | ns      | 0.9405           | OSR vs. Other      | 0.2061     | ns      | 0.8467           | OSR vs. Other      | 0.06923    | ns      | 0.9998           | OSR vs. Other      | 0.481      | ns      | 0.5023           |

**Table S4. Whole transcriptome RNAseq of putative HSF1 activators (see Excel Spreadsheet)**

**Table S5. GO analysis of HSF1 activating compound A3 (see Excel Spreadsheet)**
